# Supplementary figures and images for: Rückgang der ambulanten Antibiotikaverordnungen bei Kindern und Jugendlichen in Deutschland 2010–2019. Regionale Entwicklung in den deutschen KV-Regionen
Source: Springer Nature journal article supplement (doi:10.1007/s00112-021-01276-9), 2021-07-30

Verordnungen pro 1.000 Versicherte

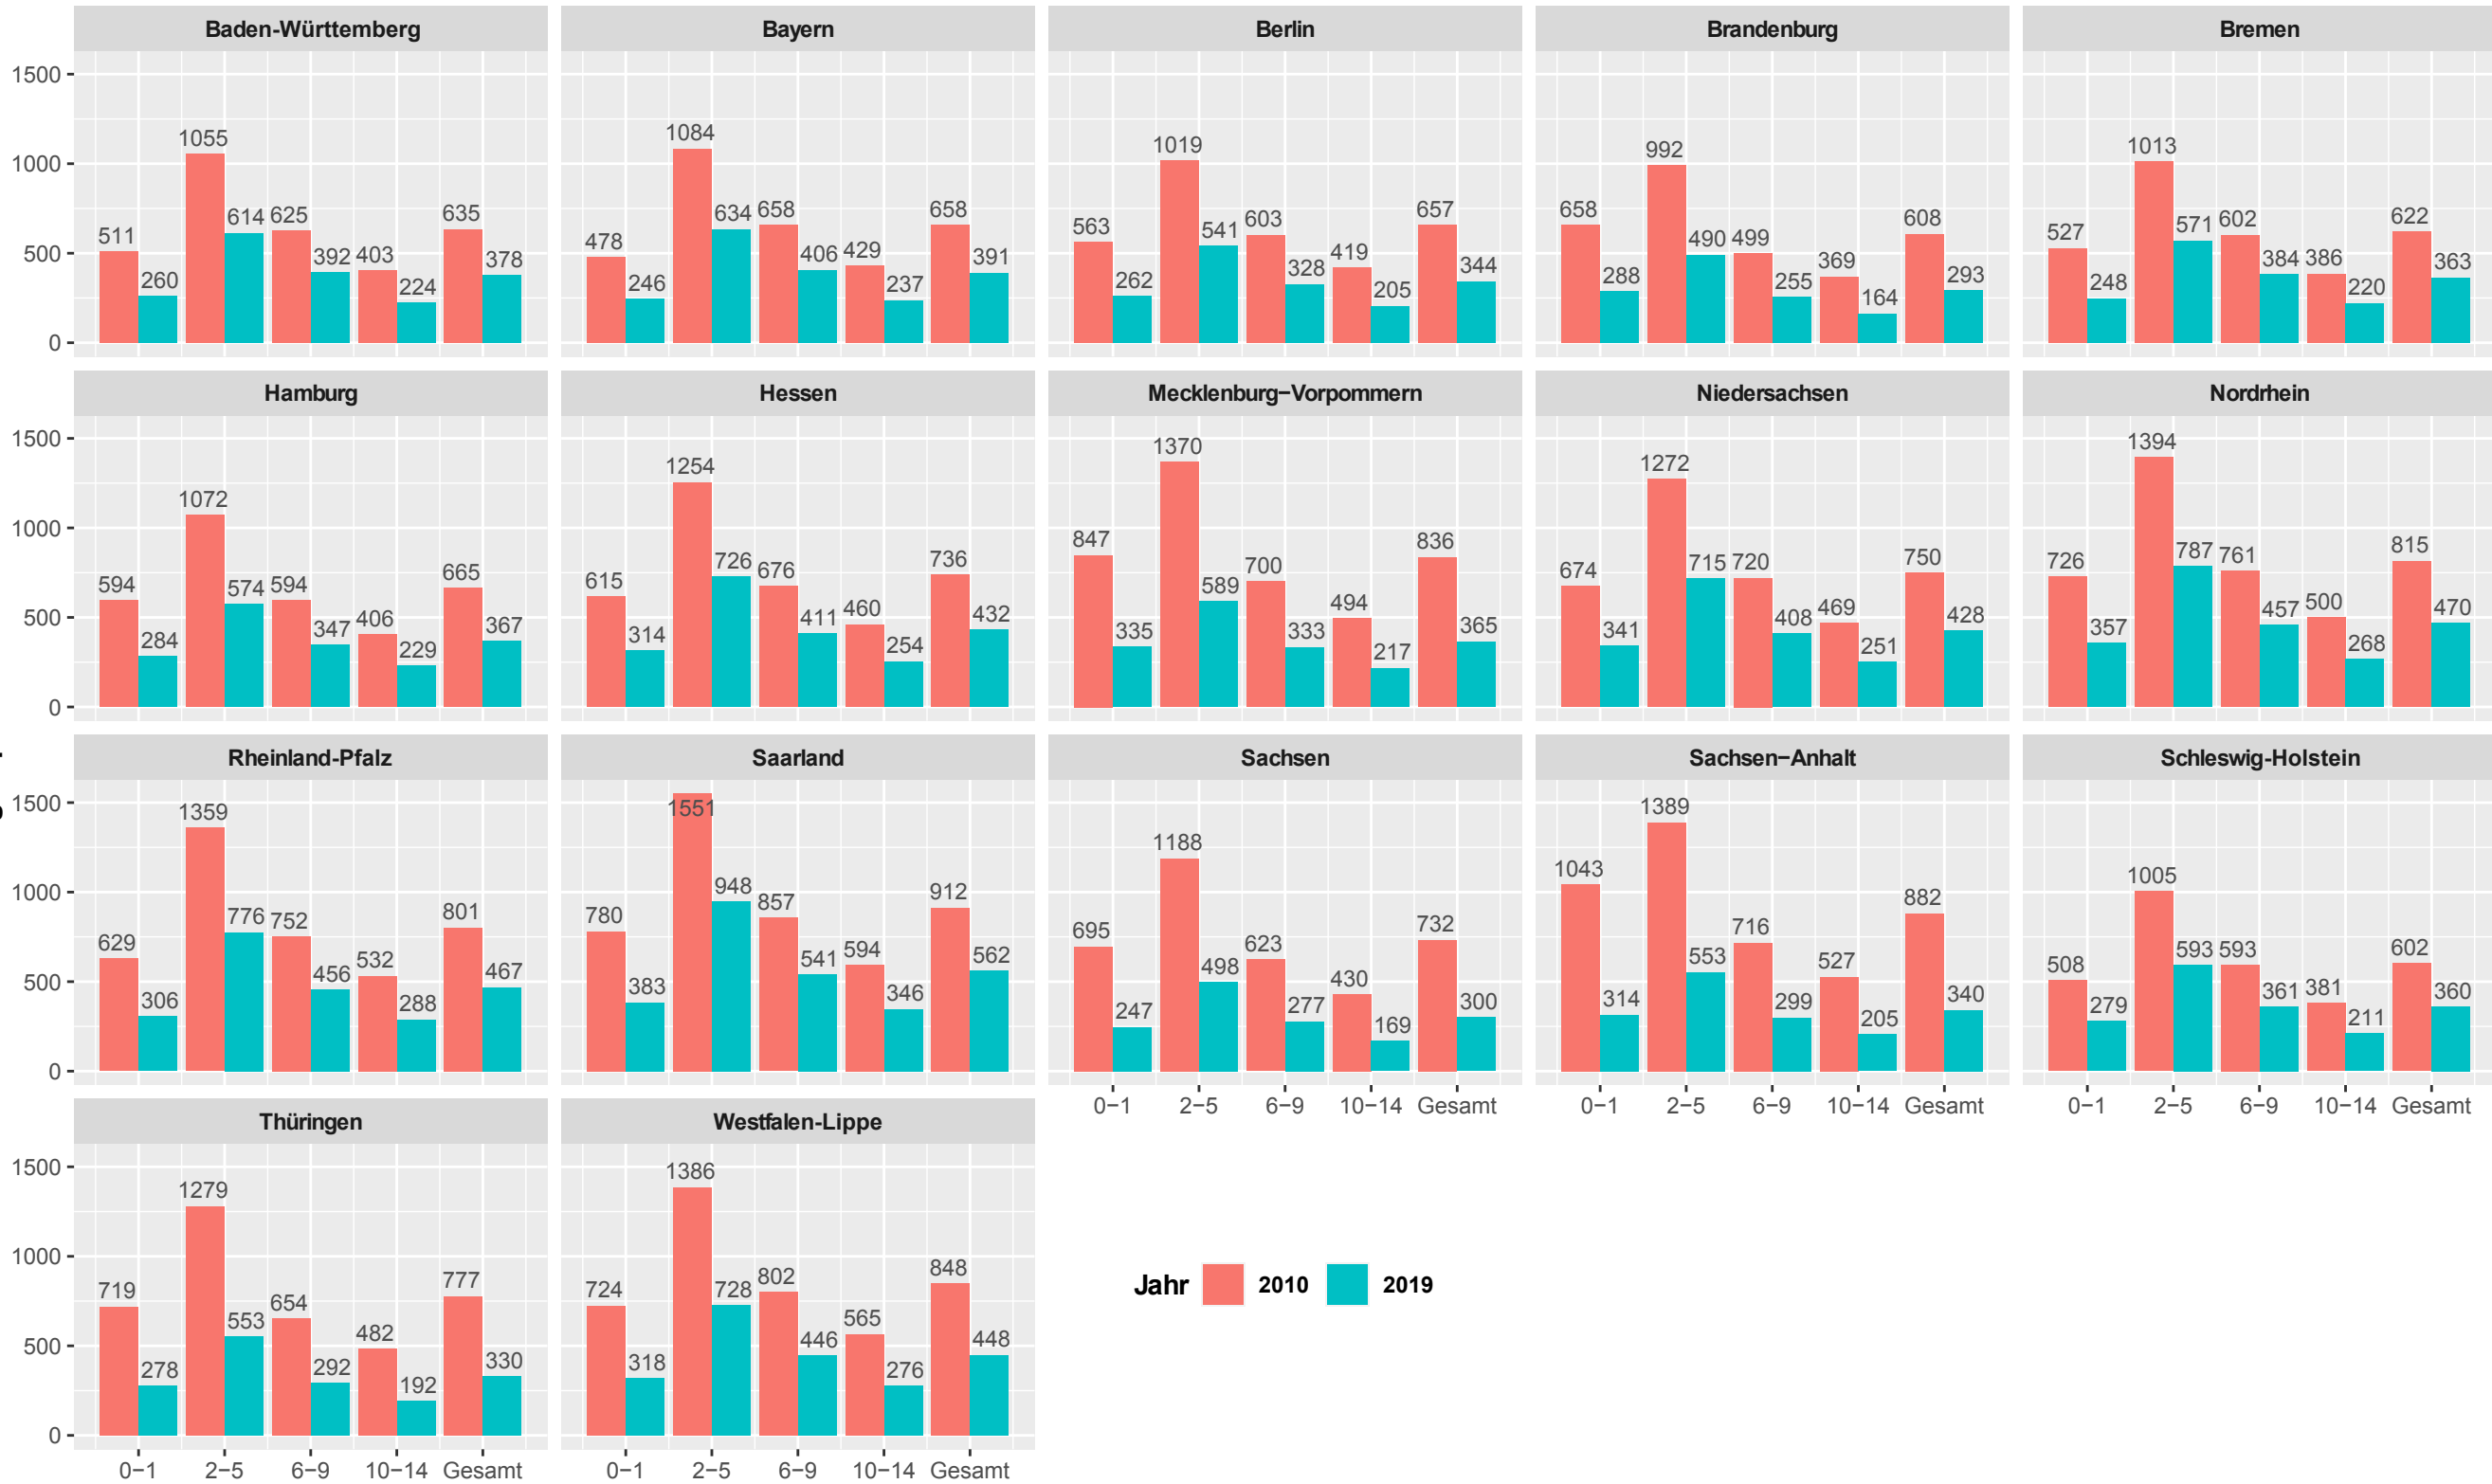

Jahr 2010 2019

Altersgruppen (Jahre)

Supplement: MOESM1 [file 19405930]
